# Supplementary material
Source: publisher figshare collection journal article supplement (https://sage.figshare.com/ndownloader/files/18746654)
Supplement: Supplementary file 1 [file 18746654]

## Appendix B Comparison of our SURE-test findings to the broader literature

| Psychometric property                                          | Our study                        | Légaré, et al.,<br>[12]         | Ferron et al.,<br>[13]**           | Decary, et al.,<br>[14]  |
|----------------------------------------------------------------|----------------------------------|---------------------------------|------------------------------------|--------------------------|
| <b>Sample (n)</b>                                              | Parents (201)                    | Adult patients (1597)           | Mixed, mostly adult patients (712) | Adult patients (146)     |
| <b>Decision</b>                                                | Antibiotic use                   | Prenatal screening              | Antibiotic use                     | Mixed                    |
| <b>Prevalence of decisional conflict (DCS)</b><br>(%, 95% CI)  | 6% (3-10)                        | NR                              | 5.2% (3.7–7.3)                     | 18% (12-25)              |
| <b>Prevalence of decisional conflict (SURE)</b><br>(%, 95% CI) | 11% (7–17)                       | 33% (NR)                        | 19% (NR)                           | 5% (NR)                  |
| <b>Internal consistency</b>                                    | 0.56                             | 0.54 – 0.65                     | 0.70                               | NR                       |
| <b>SURE-test and DCS total score correlation coefficient</b>   | $\rho = -0.36$ ,<br>$P < 0.0001$ | $r = -0.46$ ,<br>$P < 0.0001$   | $\rho = -0.45$ ,<br>$P < 0.0001$   | NR                       |
| <b>Cut-off used to dichotomize CSDC*</b>                       | DCS = > 25<br>SURE = < 4         | DCS = $\geq 37.5$<br>SURE = < 4 | DCS = $\geq 37.5$<br>SURE = < 4    | DCS = > 25<br>SURE = < 4 |
| <b>Sensitivity</b> ,<br>(%, (95% CI))                          | 32 (20- 44)                      | NR                              | 94 (78.9–99.0)                     | 15 (0.04-0.4)            |
| <b>Specificity</b> ,<br>(%, (95% CI))                          | 96 (93-100)                      | NR                              | 89.8 (87.1-92.0)                   | 97 (92.0 – 99.0)         |
| <b>+ Likelihood ratio</b><br>(95% CI)                          | 8.4 (0-17)                       | NR                              | 9.26 (7.2–11.9)                    | 4.6 (1.2-17.3)           |
| <b>- Likelihood ratio</b><br>(95% CI)                          | 0.7 (0.53-0.87)                  | NR                              | 0.07 (0.02-0.3)                    | 0.88 (0.7-1.0)           |

\*CSDC = clinically significant decisional conflict; NR = not reported; DCS = Decisional Conflict Scale; NA = not applicable.

\*\* Please note that our study is a nested secondary analysis from the dataset used in the Ferron study [12].
